# Supplementary material
Source: PubMed Central journal article supplement (PMC2914158)
Supplement: NIHMS67321-supplement-supplement_1.pdf [file NIHMS67321-supplement-supplement_1.pdf]

**Figure S1.** Generation of *Cdh1* gene-trap mice. **a.** A diagram depicting the gene-trapped allele of *Cdh1*. Arrowheads indicating the position of genotyping primers. **b.** PCR genotyping of embryos from an intercross of *Cdh1*<sup>+/*gt*</sup> mice. **c.** Western blotting analysis of *Cdh1* in E9.5 embryo. **d** and **e.** LacZ staining of an E9.5 *Cdh1*<sup>+/*gt*</sup> embryo (**d**) and placenta (**e**). Scale bar, 10  $\mu$ m.

**Figure S2.** Mitotic defects in *Cdh1*<sup>*gt/gt*</sup> MEFs. **a.** Distribution of mitotic phases. **b.** Micrographs of MEFs stained for tubulin (red) and DNA (blue). Arrows indicate binucleated cells. Scale bar, 40  $\mu$ m. **c.** Quantitation of binucleated cells in **b**. Results in **a** and **c** were from three independent experiments. Error bars are standard deviations.

**Figure S3.** Suppression of growth defects of *Cdh1* null MEFs by depleting *Ets2*. **a.** Western blot analysis of *Ets2* and p16. Full scan of the gel is presented in supplemental figure 5. **b.** Quantitation of the results in **a**. **c.** Growth curve analysis of control- and *Ets2*-shRNA treated *Cdh1* null MEFs at passage 6. Data were obtained from triplicates at each time point. Error bars represent standard deviations.

**Figure S3.** Potential function of *Cdh1* in the brain. **a.**  $\beta$ -gal staining of adult *Cdh1*<sup>+/*gt*</sup> brain. Scale bar, 20  $\mu$ m. **b.** Immunoblotting of *Cdh1* in adult hippocampus. **c.** Plot of fEPSP slope versus fiber volley amplitude. Error bars indicate SEM for ten determinations. **d.** Paired-pulse facilitation in wildtype and *Cdh1*<sup>+/*gt*</sup> mice. Shown were responses to paired pulses in which the fEPSP slope of the response to the second stimulus was expressed as a percentage of the fEPSP slope of the response to the first

stimulus plotted against the interpulse interval of the paired pulses. Error bars indicate SEM for 17 determinations.

**Figure S5.** Full gel scans of selected Western blots.

**a**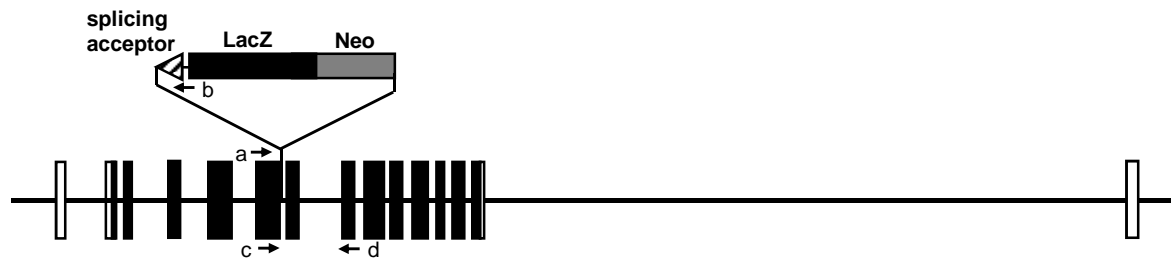**b**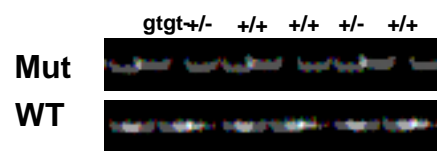**c**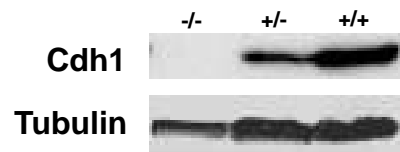**d**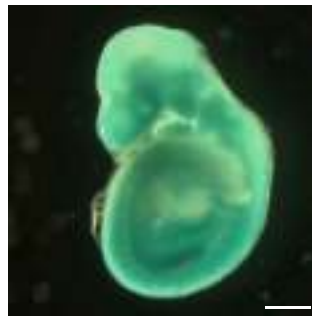**e**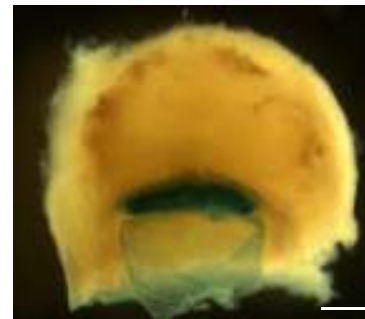**Figure S1**

**a**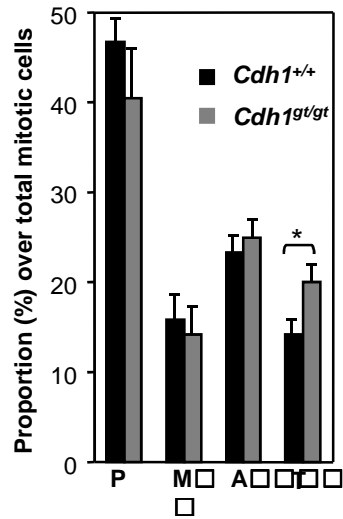**b**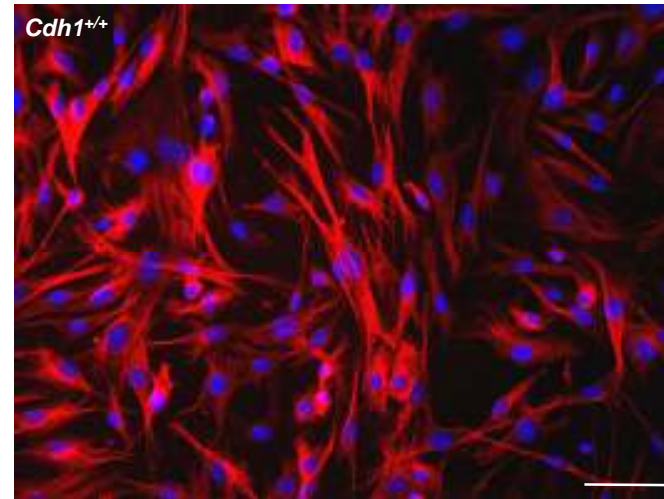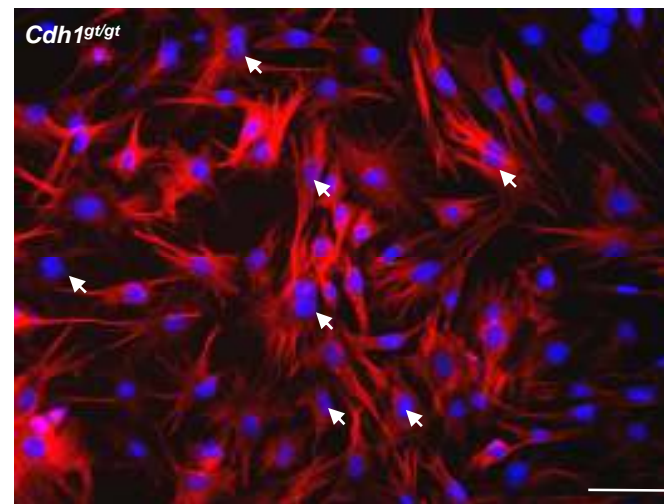**c**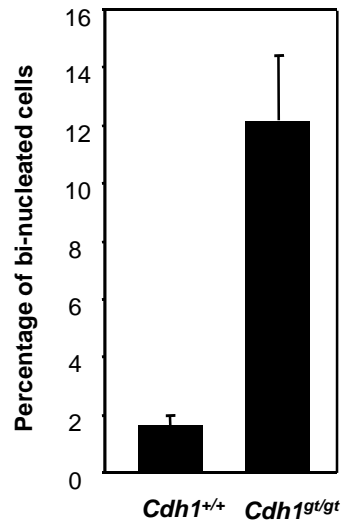**Figure S2**

**a**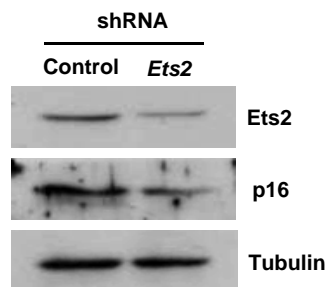**c**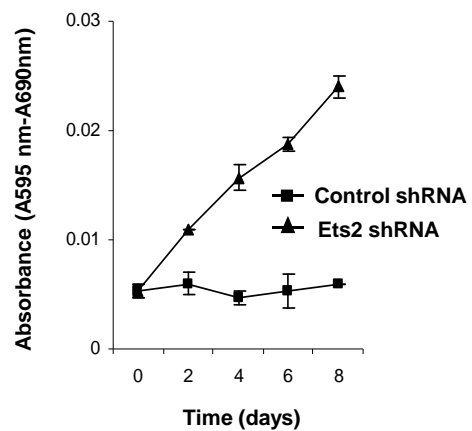**b**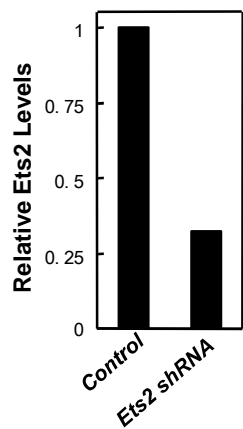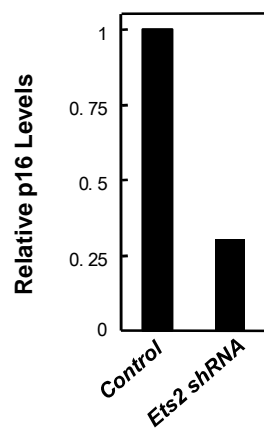

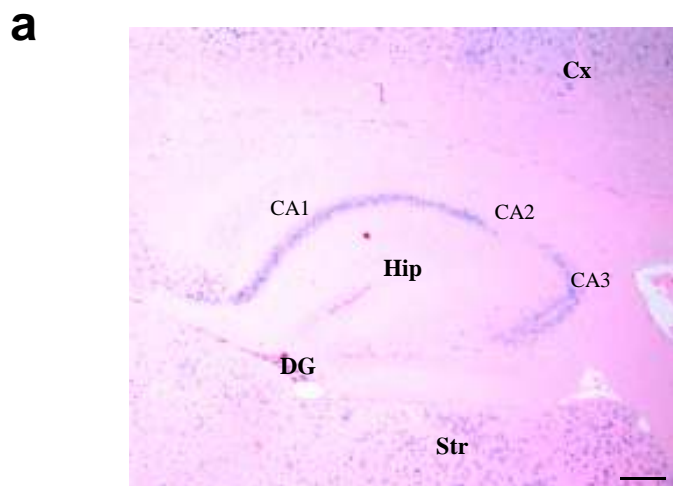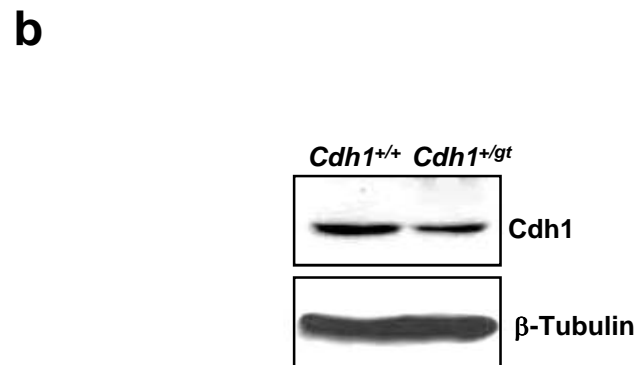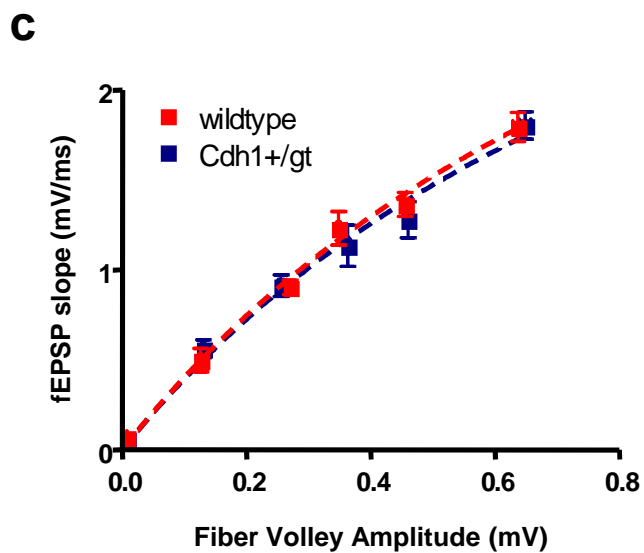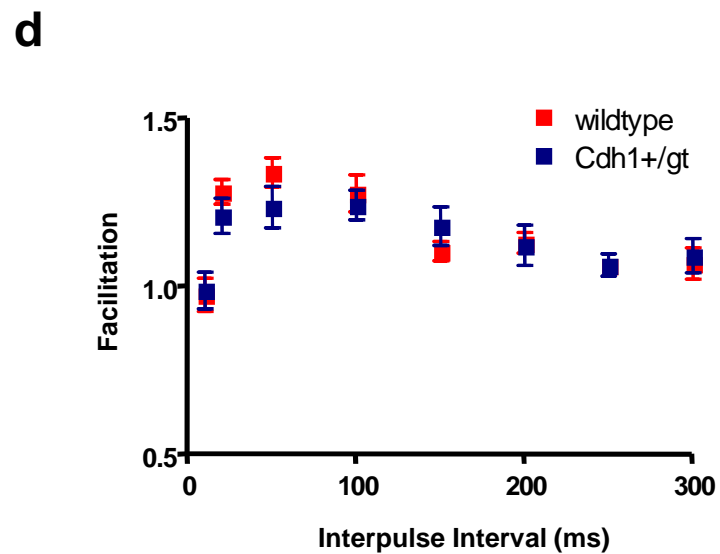

**Figure S4**

**Figure 3a**

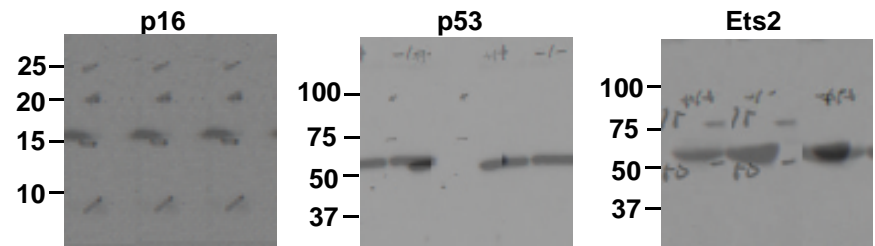

**Figure 3e**

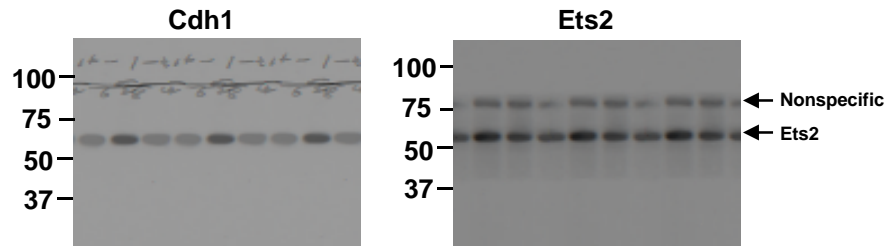

**Figure 3g**

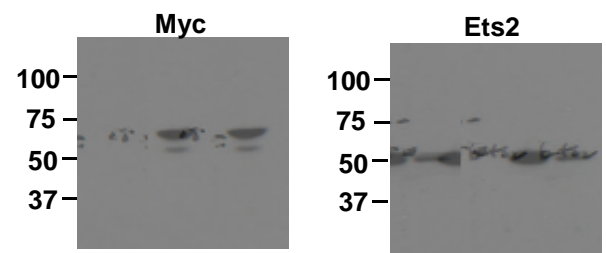

**Figure 4a**

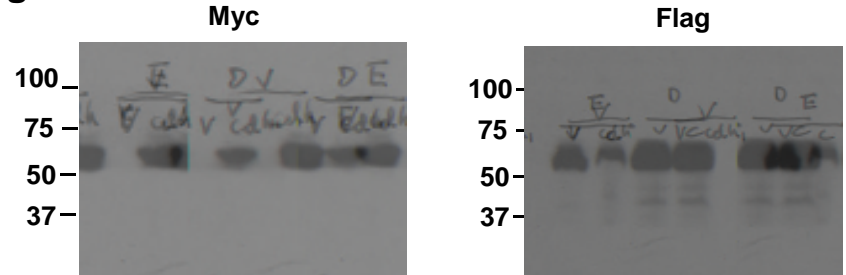

**Figure 4b**

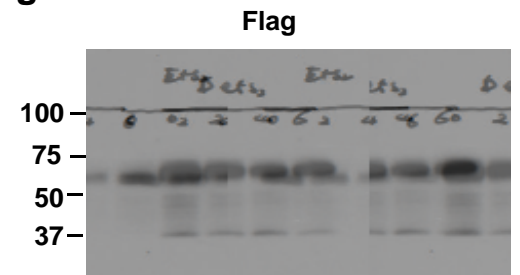

**Figure 4d**

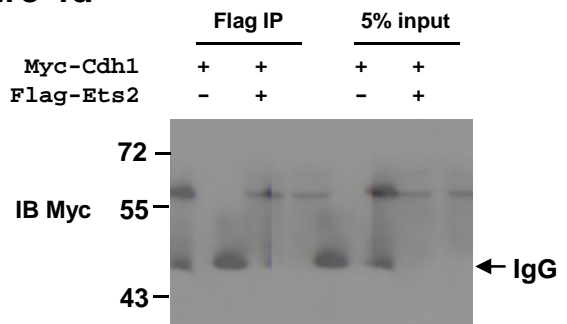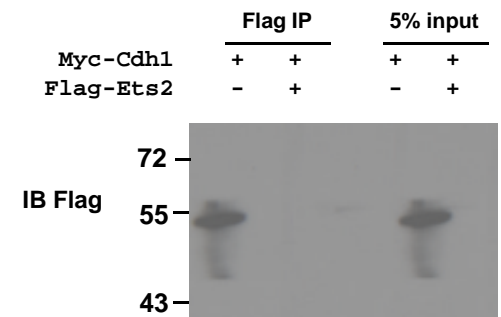

**Figure S3a**

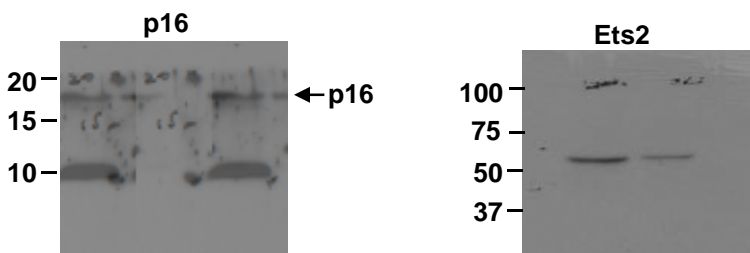

**Figure S5**
